# Supplementary material for: Prevalence of depression and association with all-cause and cardiovascular mortality among individuals with type 2 diabetes: a cohort study based on NHANES 2005–2018 data
Source: Springer Nature journal article supplement (doi:10.1186/s12888-023-04999-z), 2023-07-10
Supplement: MOESM1 [file 25599114]

**Supplemental Table S1. Prevalence of depression among adults with type 2 diabetes in the U.S. by characteristics, NHANES 2005-2018.**

| Characteristics                            | 2005-2018<br>% (95% CI) | 2005-2006<br>% (95% CI) | 2007-2008<br>% (95% CI) | 2009-2010<br>% (95% CI) | 2011-2012<br>% (95% CI) | 2013-2014<br>% (95% CI) | 2015-2016<br>% (95% CI) | 2017-2018<br>% (95% CI) | P<br>value<br>for<br>trend |
|--------------------------------------------|-------------------------|-------------------------|-------------------------|-------------------------|-------------------------|-------------------------|-------------------------|-------------------------|----------------------------|
| <b>Total depression (PHQ-9 score: ≥10)</b> |                         |                         |                         |                         |                         |                         |                         |                         |                            |
| Overall                                    | 11.6 (10.5-12.6)        | 9.1 (6.8-11.4)          | 12.1 (9.2-15.0)         | 11.9 (9.3-14.5)         | 12.1 (9.0-15.2)         | 13.4 (9.5-17.2)         | 11.3 (8.7-13.8)         | 10.7 (8.8-12.7)         | 0.743                      |
| Age, years                                 |                         |                         |                         |                         |                         |                         |                         |                         |                            |
| <60                                        | 13.5 (11.7-15.4)        | 11.6 (6.5-16.7)         | 15.1 (10.4-19.9)        | 16.0 (10.8-21.2)        | 14.2 (10.2-18.2)        | 14.8 (7.2-22.3)         | 12.8 (8.0-17.5)         | 10.8 (6.4-15.2)         | 0.211                      |
| ≥60                                        | 9.9 (8.5-11.3)          | 6.8 (2.8-10.8)          | 9.0 (5.1-12.9)          | 8.7 (5.6-11.9)          | 10.2 (6.1-14.2)         | 12.2 (6.8-17.6)         | 10.0 (5.9-14.0)         | 10.7 (7.5-13.8)         | 0.100                      |
| Gender                                     |                         |                         |                         |                         |                         |                         |                         |                         |                            |
| Male                                       | 7.8 (6.7-9.0)           | 8.5 (3.3-13.8)          | 8.2 (5.6-10.9)          | 8.5 (6.1-10.8)          | 6.1 (2.9-9.2)           | 8.0 (4.0-11.9)          | 6.1 (3.5-8.7)           | 9.6 (6.2-12.9)          | 0.971                      |
| Female                                     | 15.6 (13.8-17.5)        | 9.7 (6.4-12.9)          | 16.1 (11.2-21.0)        | 15.8 (10.4-21.3)        | 17.9 (11.8-24.1)        | 19.5 (13.9-25.2)        | 17.5 (12.6-22.4)        | 12.0 (7.0-17.1)         | 0.536                      |
| Race/ethnicity                             |                         |                         |                         |                         |                         |                         |                         |                         |                            |
| Non-Hispanic White                         | 11.2 (9.5-12.8)         | 9.1 (5.3-12.9)          | 11.6 (7.3-15.8)         | 10.4 (6.2-14.6)         | 10.3 (5.9-14.7)         | 12.7 (6.4-18.9)         | 12.2 (6.8-17.6)         | 11.0 (7.8-14.3)         | 0.422                      |
| Non-Hispanic Black                         | 12.1 (10.4-13.9)        | 11.6 (8.9-14.3)         | 12.6 (8.7-16.4)         | 17.0 (9.7-24.2)         | 12.9 (8.6-17.3)         | 15.6 (9.4-21.7)         | 6.9 (3.5-10.4)          | 9.8 (5.3-14.2)          | 0.063                      |
| Other races                                | 12.2 (10.4-14.0)        | 6.8 (2.0-11.5)          | 13.6 (7.6-19.6)         | 12.8 (8.2-17.3)         | 15.5 (8.2-22.9)         | 14.0 (10.2-17.8)        | 11.4 (7.9-14.8)         | 10.5 (5.9-15.2)         | 0.769                      |
| Education level                            |                         |                         |                         |                         |                         |                         |                         |                         |                            |
| <High school                               | 17.3 (15.0-19.5)        | 8.3 (3.5-13.1)          | 15.3 (10.7-19.8)        | 21.8 (16.3-27.4)        | 20.8 (10.9-30.8)        | 22.0 (15.0-29.1)        | 13.1 (8.8-17.3)         | 18.1 (11.2-25.0)        | 0.151                      |
| ≥High school graduate                      | 9.8 (8.6-11.0)          | 9.4 (6.2-12.5)          | 10.8 (6.8-14.9)         | 8.1 (6.0-10.3)          | 8.9 (5.9-11.9)          | 11.0 (6.5-15.5)         | 10.7 (6.9-14.5)         | 9.1 (6.8-11.5)          | 0.490                      |
| Marital status                             |                         |                         |                         |                         |                         |                         |                         |                         |                            |
| Married or living with partner             | 9.3 (7.8-10.7)          | 8.5 (4.9-12.2)          | 10.5 (6.1-15.0)         | 10.3 (6.2-14.4)         | 7.5 (4.4-10.6)          | 12.1 (6.0-18.2)         | 9.7 (6.0-13.4)          | 6.8 (3.6-9.9)           | 0.430                      |
| Unmarried                                  | 15.6 (13.8-17.4)        | 10.3 (7.2-13.4)         | 14.9 (10.1-19.6)        | 14.8 (10.0-19.6)        | 18.8 (13.1-24.4)        | 15.4 (10.7-20.1)        | 14.0 (8.4-19.7)         | 18.9 (13.7-24.1)        | 0.076                      |
| Smoke                                      |                         |                         |                         |                         |                         |                         |                         |                         |                            |

|                             |                  |                 |                  |                  |                 |                  |                  |                 |       |
|-----------------------------|------------------|-----------------|------------------|------------------|-----------------|------------------|------------------|-----------------|-------|
| never-smoker                | 9.4 (7.9-10.9)   | 8.0 (3.9-12.2)  | 7.0 (3.5-10.5)   | 10.4 (6.7-14.0)  | 11.1 (5.9-16.2) | 11.6 (6.9-16.2)  | 8.4 (4.5-12.3)   | 9.2 (5.1-13.3)  | 0.592 |
| smoker                      | 13.6 (12.1-15.1) | 10.2 (5.1-15.3) | 16.6 (12.0-21.2) | 13.3 (10.1-16.4) | 13.2 (9.5-16.9) | 15.1 (9.3-20.8)  | 13.7 (10.4-17.1) | 12.5 (8.4-16.5) | 0.997 |
| Hypertension, no            | 10.7 (8.4-12.9)  | 6.1 (1.2-11.0)  | 12.3 (3.4-21.2)  | 12.6 (9.3-16.0)  | 16.8 (9.1-24.4) | 11.4 (3.8-19.1)  | 9.6 (4.5-14.6)   | 6.2 (2.5-9.8)   | 0.390 |
| Hypertension, yes           | 11.9 (10.7-13.0) | 9.8 (7.5-12.2)  | 12.0 (8.9-15.2)  | 11.8 (8.7-14.8)  | 11.2 (7.5-14.8) | 14.1 (10.0-18.2) | 11.9 (8.1-15.7)  | 11.7 (9.4-14.0) | 0.400 |
| Coronary heart disease, no  | 10.7 (8.4-12.9)  | 9.3 (6.8-11.7)  | 12.1 (8.5-15.7)  | 10.9 (7.5-14.3)  | 10.9 (7.9-13.8) | 12.5 (8.4-16.7)  | 11.2 (8.1-14.2)  | 10.3 (7.9-12.8) | 0.844 |
| Coronary heart disease, yes | 11.9 (10.7-13.0) | 7.8 (0.9-14.7)  | 12.2 (2.6-21.8)  | 18.3 (4.0-32.7)  | 17.6 (0-35.6)   | 20.2 (8.1-32.2)  | 14.3 (0-29.7)    | 13.0 (2.8-23.3) | 0.624 |
| Stroke, no                  | 11.0 (9.9-12.1)  | 8.7 (6.3-11.1)  | 11.6 (8.4-14.8)  | 11.5 (8.4-14.7)  | 11.3 (7.8-14.9) | 13.0 (8.7-17.3)  | 11.2 (8.4-14.0)  | 9.3 (7.0-11.7)  | 0.961 |
| Stroke, yes                 | 17.6 (13.6-21.6) | 12.7 (5.9-19.5) | 17.1 (8.0-26.3)  | 16.4 (8.5-24.3)  | 23.5 (7.2-39.8) | 17.8 (5.1-30.5)  | 12.3 (5.6-18.9)  | 22.9 (9.9-35.9) | 0.342 |

**Moderate depression (PHQ-9 score: 10-14)**

|                    |                |                |                 |                |                |                 |                 |                |       |
|--------------------|----------------|----------------|-----------------|----------------|----------------|-----------------|-----------------|----------------|-------|
| Overall            | 7.3 (6.4-8.2)  | 6.0 (3.7-8.3)  | 8.4 (5.2-11.7)  | 6.8 (5.1-8.6)  | 6.7 (4.6-8.8)  | 8.4 (4.8-11.9)  | 6.5 (4.2-8.8)   | 7.8 (5.8-9.8)  | 0.702 |
| Age, years         |                |                |                 |                |                |                 |                 |                |       |
| <60                | 8.3 (6.8-9.7)  | 6.5 (3.7-9.4)  | 10.5 (5.6-15.4) | 9.0 (5.8-12.1) | 8.1 (4.5-11.8) | 8.2 (2.6-13.8)  | 7.7 (4.1-11.3)  | 7.9 (4.3-11.6) | 0.700 |
| ≥60                | 6.4 (5.2-7.7)  | 5.6 (2.3-8.8)  | 6.3 (2.6-10.1)  | 5.2 (3.6-6.8)  | 5.4 (2.4-8.3)  | 8.5 (3.4-13.6)  | 5.5 (2.8-8.3)   | 7.7 (4.2-11.2) | 0.317 |
| Gender             |                |                |                 |                |                |                 |                 |                |       |
| Male               | 5.4 (4.4-6.4)  | 4.9 (1.7-8.1)  | 5.5 (2.6-8.4)   | 5.6 (3.2-8.0)  | 3.7 (2.0-5.4)  | 6.6 (2.4-10.9)  | 3.5 (1.2-5.7)   | 7.6 (4.6-10.5) | 0.454 |
| Female             | 9.4 (7.7-11.0) | 7.1 (3.6-10.6) | 11.5 (6.4-16.6) | 8.3 (5.6-10.9) | 9.6 (5.7-13.5) | 10.4 (5.0-15.7) | 10.2 (6.2-14.3) | 8.1 (2.9-13.2) | 0.969 |
| Race/ethnicity     |                |                |                 |                |                |                 |                 |                |       |
| Non-Hispanic White | 7.4 (6.0-8.8)  | 5.8 (2.0-9.5)  | 9.2 (4.8-13.6)  | 6.0 (3.4-8.5)  | 6.1 (2.9-9.2)  | 8.8 (3.3-14.3)  | 7.4 (3.3-11.4)  | 7.9 (4.3-11.4) | 0.624 |
| Non-Hispanic Black | 6.9 (5.5-8.4)  | 7.6 (4.2-11.0) | 5.9 (3.2-8.6)   | 9.9 (5.1-14.7) | 5.2 (2.4-7.9)  | 9.4 (3.8-14.9)  | 3.9 (1.13-6.69) | 7.8 (2.7-12.9) | 0.734 |
| Other races        | 7.2 (5.8-8.6)  | 5.4 (1.4-9.4)  | 8.4 (3.5-13.2)  | 7.3 (2.4-12.1) | 9.0 (4.9-13.2) | 6.7 (4.6-8.8)   | 6.0 (3.4-8.6)   | 7.6 (2.9-12.3) | 0.939 |
| Education level    |                |                |                 |                |                |                 |                 |                |       |

|                                |                 |                |                 |                 |                 |                 |                |                 |       |
|--------------------------------|-----------------|----------------|-----------------|-----------------|-----------------|-----------------|----------------|-----------------|-------|
| <High school                   | 9.3 (7.8-10.8)  | 5.8 (2.1-9.5)  | 9.0 (5.2-12.7)  | 11.0 (7.4-14.6) | 9.8 (5.7-14.0)  | 13.0 (6.0-20.1) | 5.2 (3.2-7.2)  | 11.4 (6.6-16.2) | 0.440 |
| ≥High school graduate          | 6.6 (5.6-7.7)   | 6.1 (2.9-9.3)  | 8.2 (4.3-12.2)  | 5.3 (3.5-7.1)   | 5.5 (3.2-7.9)   | 7.1 (3.3-10.9)  | 6.8 (3.8-9.9)  | 6.9 (4.7-9.1)   | 0.797 |
| Marital status                 |                 |                |                 |                 |                 |                 |                |                 |       |
| Married or living with partner | 5.9 (4.7-7.1)   | 5.4 (2.6-8.2)  | 7.4 (3.1-11.7)  | 6.4 (3.4-9.4)   | 3.6 (1.0-6.2)   | 7.7 (2.7-12.8)  | 5.8 (2.7-8.8)  | 5.0 (2.4-7.7)   | 0.627 |
| Unmarried                      | 9.8 (8.3-11.3)  | 7.3 (3.1-11.5) | 10.2 (5.6-14.9) | 7.7 (4.8-10.6)  | 11.1 (6.6-15.7) | 9.5 (5.6-13.3)  | 7.9 (4.4-11.3) | 13.5 (8.4-18.7) | 0.186 |
| Smoke                          |                 |                |                 |                 |                 |                 |                |                 |       |
| never-smoker                   | 5.7 (4.5-7.0)   | 4.6 (1.5-7.7)  | 4.8 (2.0-7.7)   | 5.4 (2.6-8.1)   | 6.1 (1.8-10.4)  | 6.7 (2.6-10.7)  | 5.1 (1.8-8.5)  | 6.7 (3.5-10.0)  | 0.314 |
| smoker                         | 8.8 (7.5-10.0)  | 7.5 (4.1-10.8) | 11.6 (6.7-16.5) | 8.1 (6.1-10.1)  | 7.3 (5.3-9.3)   | 9.9 (4.8-15.1)  | 7.7 (5.4-10.1) | 9.0 (5.4-12.6)  | 0.781 |
| Hypertension, no               | 6.0 (4.1-8.0)   | 1.4 (0-3.4)    | 9.8 (1.5-18.1)  | 6.5 (2.8-10.2)  | 10.9 (2.8-19.0) | 5.5 (0-11.0)    | 6.1 (1.9-10.3) | 1.7 (0-4.0)     | 0.290 |
| Hypertension, yes              | 7.6 (6.7-8.6)   | 7.2 (4.4-10.0) | 8.0 (5.0-11.0)  | 7.0 (4.6-9.3)   | 5.8 (3.6-8.0)   | 9.3 (5.5-13.0)  | 6.7 (4.0-9.4)  | 9.0 (6.8-11.3)  | 0.379 |
| Coronary heart disease, no     | 7.1 (6.1-8.0)   | 6.0 (3.5-8.4)  | 8.4 (4.9-11.9)  | 6.4 (4.3-8.5)   | 5.8 (4.3-7.2)   | 8.0 (4.1-11.9)  | 6.6 (4.4-8.9)  | 7.8 (5.5-10.1)  | 0.622 |
| Coronary heart disease, yes    | 8.6 (5.2-11.9)  | 6.2 (0-14.0)   | 8.7 (0-17.6)    | 9.9 (0.5-19.2)  | 9.8 (0-23.3)    | 10.8 (0-22.3)   | 6.5 (0.3-12.7) | 7.9 (0.1-15.7)  | 0.973 |
| Stroke, no                     | 6.9 (6.0-7.8)   | 5.6 (3.3-8.0)  | 8.1 (4.9-11.4)  | 6.4 (4.4-8.4)   | 6.6 (4.1-9.0)   | 8.4 (5.1-11.8)  | 6.5 (4.2-8.8)  | 6.6 (4.4-8.8)   | 0.945 |
| Stroke, yes                    | 10.8 (7.3-14.3) | 9.0 (2.1-15.8) | 11.6 (2.7-20.6) | 11.9 (5.3-18.6) | 8.6 (0-17.5)    | 7.8 (0-18.1)    | 6.7 (0.2-13.3) | 17.6 (5.4-29.8) | 0.489 |

**Moderately severe to severe depression (PHQ-9 score: ≥15)**

|            |               |               |               |                |               |               |               |               |       |
|------------|---------------|---------------|---------------|----------------|---------------|---------------|---------------|---------------|-------|
| Overall    | 4.3 (3.7-4.9) | 3.1 (0.2-5.9) | 3.7 (2.9-4.5) | 5.1 (3.3-6.8)  | 5.4 (3.2-7.6) | 5.0 (3.7-6.3) | 4.7 (2.9-6.6) | 2.9 (1.8-4.1) | 0.958 |
| Age, years |               |               |               |                |               |               |               |               |       |
| <60        | 5.2 (4.2-6.3) | 5.1 (0-10.8)  | 4.7 (3.2-6.1) | 7.0 (3.4-10.6) | 6.1 (3.0-9.2) | 6.6 (3.4-9.7) | 5.1 (2.3-7.8) | 2.9 (1.4-4.4) | 0.333 |
| ≥60        | 3.5 (2.6-4.3) | 1.2 (0-2.6)   | 2.6 (1.7-3.6) | 3.6 (1.5-5.7)  | 4.8 (2.4-7.2) | 3.7 (2.3-5.1) | 4.5 (0.6-8.3) | 3.0 (1.3-4.7) | 0.154 |
| Gender     |               |               |               |                |               |               |               |               |       |
| Male       | 2.4 (1.8-3.1) | 3.6 (0-7.9)   | 2.7 (1.7-3.7) | 2.9 (1.8-4.0)  | 2.4 (0.2-4.6) | 1.3 (0.5-2.2) | 2.7 (0.6-4.7) | 2.0 (0.7-3.3) | 0.301 |

|                                |               |               |               |                 |                 |                 |                |                |       |
|--------------------------------|---------------|---------------|---------------|-----------------|-----------------|-----------------|----------------|----------------|-------|
| Female                         | 6.3 (5.2-7.3) | 2.6 (0.7-4.4) | 4.7 (2.9-6.4) | 7.6 (3.8-11.3)  | 8.4 (4.3-12.4)  | 9.2 (6.0-12.4)  | 7.3 (4.2-10.3) | 4.0 (1.8-6.2)  | 0.229 |
| Race/ethnicity                 |               |               |               |                 |                 |                 |                |                |       |
| Non-Hispanic White             | 3.8 (2.9-4.7) | 3.4 (0-7.7)   | 2.4 (1.4-3.3) | 4.4 (1.8-7.1)   | 4.2 (1.9-6.5)   | 3.9 (2.1-5.7)   | 4.9 (1.5-8.2)  | 3.1 (1.4-4.9)  | 0.638 |
| Non-Hispanic Black             | 5.2 (4.0-6.4) | 4.0 (1.1-6.9) | 6.7 (3.4-9.9) | 7.1 (1.6-12.5)  | 7.7 (5.1-10.4)  | 6.2 (2.1-10.3)  | 3.0 (0.3-5.7)  | 2.0 (0-4.1)    | 0.025 |
| Other races                    | 5.0 (4.0-6.0) | 1.4 (0-3.0)   | 5.2 (2.0-8.5) | 5.5 (4.4-6.6)   | 6.5 (1.6-11.3)  | 7.3 (4.3-10.3)  | 5.4 (3.4-7.3)  | 2.9 (1.1-4.8)  | 0.973 |
| Education level                |               |               |               |                 |                 |                 |                |                |       |
| <High school                   | 7.9 (6.4-9.5) | 2.5 (0.1-4.9) | 6.3 (4.1-8.5) | 10.8 (6.2-15.4) | 11.0 (4.2-17.8) | 9.0 (4.1-13.9)  | 7.9 (4.0-11.7) | 6.7 (2.8-10.5) | 0.163 |
| ≥High school graduate          | 3.2 (2.5-3.8) | 3.3 (0-7.0)   | 2.6 (1.8-3.4) | 2.9 (1.5-4.2)   | 3.4 (1.8-5.0)   | 3.9 (2.3-5.5)   | 3.9 (1.8-5.9)  | 2.2 (1.1-3.4)  | 0.943 |
| Marital status                 |               |               |               |                 |                 |                 |                |                |       |
| Married or living with partner | 3.4 (2.7-4.1) | 3.1 (0-6.5)   | 3.1 (2.0-4.2) | 3.9 (1.4-6.4)   | 3.9 (1.8-6.0)   | 4.4 (2.5-6.3)   | 3.9 (2.1-5.7)  | 1.8 (0.6-2.9)  | 0.482 |
| Unmarried                      | 5.8 (4.7-7.0) | 3.0 (0.4-5.6) | 4.6 (2.8-6.5) | 7.1 (3.5-10.7)  | 7.6 (4.1-11.1)  | 6.0 (3.4-8.5)   | 6.2 (2.1-10.2) | 5.4 (2.8-7.9)  | 0.354 |
| Smoke                          |               |               |               |                 |                 |                 |                |                |       |
| never-smoker                   | 3.7 (2.8-4.6) | 3.5 (0-8.6)   | 2.2 (0.8-3.5) | 5.0 (2.5-7.4)   | 5.0 (2.6-7.4)   | 4.9 (2.6-7.2)   | 3.3 (1.1-5.5)  | 2.5 (0.4-4.5)  | 0.714 |
| smoker                         | 4.9 (4.0-5.7) | 2.7 (0.4-5.0) | 5.0 (3.5-6.4) | 5.2 (2.5-7.8)   | 5.9 (2.8-9.0)   | 5.1 (3.3-6.9)   | 6.0 (3.6-8.4)  | 3.5 (1.6-5.3)  | 0.622 |
| Hypertension, no               | 4.6 (3.2-6.1) | 4.7 (0-9.6)   | 2.5 (0.3-4.7) | 6.2 (2.7-9.6)   | 5.9 (0.9-10.8)  | 5.9 (0.5-11.4)  | 3.5 (0.1-6.8)  | 4.4 (1.6-7.2)  | 0.989 |
| Hypertension, yes              | 4.2 (3.5-4.9) | 2.7 (0-5.3)   | 4.0 (3.0-5.0) | 4.8 (2.7-6.9)   | 5.4 (2.9-7.8)   | 4.8 (3.6-6.1)   | 5.1 (2.2-8.1)  | 2.7 (1.6-3.8)  | 0.985 |
| Coronary heart disease, no     | 4.0 (3.3-4.7) | 3.3 (0.1-6.5) | 3.6 (2.7-4.5) | 4.5 (2.3-6.7)   | 5.1 (2.7-7.5)   | 4.5 (3.0-6.0)   | 4.5 (2.5-6.5)  | 2.5 (1.6-3.5)  | 0.691 |
| Coronary heart disease, yes    | 6.3 (3.7-8.8) | 1.6 (0-5.4)   | 3.5 (0.5-6.4) | 8.5 (1.6-15.3)  | 7.7 (1.4-14.1)  | 9.4 (4.4-14.5)  | 7.8 (0-22.3)   | 5.1 (0.5-9.8)  | 0.341 |
| Stroke, no                     | 4.1 (3.4-4.7) | 3.0 (0-6.2)   | 3.5 (2.8-4.2) | 5.1 (3.1-7.1)   | 4.8 (2.7-6.9)   | 4.6 (3.0-6.1)   | 4.7 (2.7-6.7)  | 2.7 (1.5-3.9)  | 0.872 |
| Stroke, yes                    | 6.8 (4.4-9.3) | 3.7 (0-8.6)   | 5.5 (1.6-9.4) | 4.5 (0-9.5)     | 14.9 (.3-29.6)  | 10.0 (1.5-18.5) | 5.6 (0.6-10.5) | 5.3 (0.9-9.8)  | 0.526 |
